# Supplementary material
Source: HighWire-hosted journal article supplement (http://thorax.bmjjournals.com/highwire/filestream/174504/field_highwire_adjunct_files/1/605401t2.pdf)
Supplement: 605401t2.pdf [file 605401t2.pdf]

Table S2a. Health related quality of life (SF36) among SARS survivors (n=31) who had required ICU admission at 3 and 6 months after illness onset in comparison with Hong Kong normative data stratified into different age groups<sup>28</sup>

| <i>SF 36</i>  | <i>Normal</i> | <i>3 months vs Normal</i>                   | <i>6 months vs Normal</i>                   |
|---------------|---------------|---------------------------------------------|---------------------------------------------|
| <i>Domain</i> | Mean(SD)      | Mean (SD), Mean $\Delta$ (95% CI), <i>p</i> | Mean (SD), Mean $\Delta$ (95% CI), <i>p</i> |
| PF            |               |                                             |                                             |
| 18-40 yrs     | 96.3(6.6)     | 82.4(14.6), -13.9(-20.9 to -6.9)*           | 87.1(10.0), -9.1 (-14.0 to -4.3)*           |
| 41-64 yrs     | 90.6(12.4)    | 68.3(21.5), -22.3(-36.0 to -8.6)*           | 72.9(24.1), -17.7(-33.0 to -2.4)**          |
| RP            |               |                                             |                                             |
| 18-40 yrs     | 85.6(27.7)    | 30.3(35.9), -55.3 (-72.7 to -37.9)*         | 76.3(30.6), -9.3 (-21.8 to 3.3),ns          |
| 41-64 yrs     | 81.6(31.7)    | 12.5(29.2), -69.1(-87.2 to -51.0)*          | 27.1(37.6), -54.5(-72.7 to -36.4)*          |
| BP            |               |                                             |                                             |
| 18-40 yrs     | 86.4(19.4)    | 71.0(27.5), -15.3 (-28.7 to -2.1)**         | 73.7(22.1), -12.7 (-21.5 to -3.8)*          |
| 41-64 yrs     | 82.6(22.9)    | 64.2(31.7), -18.4(-38.7 to 1.9),ns          | 69.1(27.7), -13.5(-26.7 to -0.4) #          |
| GH            |               |                                             |                                             |
| 18-40 yrs     | 59.5(19.4)    | 55.6(20.3), -3.9 (-12.7 to 4.9),ns          | 52.4(15.1), -7.1 (-15.9 to 1.6),ns          |
| 41-64 yrs     | 53.2(20.1)    | 44.1(18.4), -9.2(-20.6 to 2.3),ns           | 49.7(20.8), -3.6(-15.1 to 7.9),ns           |
| VT            |               |                                             |                                             |
| 18-40 yrs     | 60.2(18.3)    | 50.3(8.3), -9.9 (-14.0 to -5.8)*            | 50.5(11.4), -9.7 (-15.2 to -4.1)*           |
| 41-64 yrs     | 60.3(18.9)    | 46.7(10.3), -13.7(-20.3 to -7.0)*           | 47.9(12.3), -12.4(-23.1 to -1.7)**          |
| SF            |               |                                             |                                             |
| 18-40 yrs     | 90.2(16.2)    | 57.2(26.5), -33.0 (-45.8 to -20.2)*         | 77.6(16.4), -12.6 (-20.0 to -5.3)*          |
| 41-64 yrs     | 92.4(16.5)    | 58.3(25.2), -34.1(-50.2 to -18.1)*          | 70.8(22.2), -21.6(-31.1 to -12.1)*          |
| RE            |               |                                             |                                             |
| 18-40 yrs     | 67.7(39.4)    | 54.4(43.3), -13.4 (-31.2 to 4.5),ns         | 82.5(25.7), 14.7 (2.1 to 27.3)**            |
| 41-64 yrs     | 75.0(37.0)    | 19.4(30.0), -55.5(-76.6 to -34.4)*          | 47.2(48.1), -27.2(-49.0 to -6.5)**          |
| MH            |               |                                             |                                             |
| 18-40 yrs     | 71.8(15.6)    | 63.6(13.9), -8.7 (-16.7 to -1.6)**          | 67.8(12.8), -4.0 (-11.1 to 3.0),ns          |
| 41-64 yrs     | 73.1(17.6)    | 61.0(20.1), -12.1(-22.1 to -2.0)**          | 68.3(19.0), -4.7(-14.8 to 5.3),ns           |

Physical functioning (PF), social functioning (SF), role limitation due to physical problems (RP), role limitation due to emotional problem (RE), mental health (MH), bodily pain (BP), vitality (VT), and general health (GH); Among the normal controls, 1244 and 695 were in the age groups 18-40 yrs and 41-64 yrs whereas there were 19 and 12 SARS survivors in the same age categories respectively.

\* Significant at  $p < 0.01$ ; \*\* Significant at  $p < 0.03$ ; # Significant at  $p < 0.05$ ; ns denotes not significant.

Table S2b. Health related quality of life (SF36) among SARS survivors (n=79) who did not require ICU admission at 3 and 6 months after illness onset in comparison with Hong Kong normative data stratified into different age groups<sup>28</sup>

| <i>SF 36</i>  | <i>Normal</i> | <i>3 months vs Normal</i>                   | <i>6 months vs Normal</i>                   |
|---------------|---------------|---------------------------------------------|---------------------------------------------|
| <i>Domain</i> | Mean(SD)      | Mean (SD), Mean $\Delta$ (95% CI), <i>p</i> | Mean (SD), Mean $\Delta$ (95% CI), <i>p</i> |
| PF            |               |                                             |                                             |
| 18-40 yrs     | 96.3(6.6)     | 85.8(14.8), -10.4(-14.3 to -6.6)*           | 84.8(15.7), -11.5 (-15.6 to -7.4)*          |
| 41-64 yrs     | 90.6(12.4)    | 62.1(25.2), -28.5(-40.7 to -16.3)*          | 62.4(26.6), -28.3(-41.1 to -15.4)*          |
| RP            |               |                                             |                                             |
| 18-40 yrs     | 85.6(27.7)    | 52.9(40.9), -32.7 (-43.4 to -22.0)*         | 76.3(38.6), -9.3 (-19.4 to 0.8),ns          |
| 41-64 yrs     | 81.6(31.7)    | 30.3(34.9), -51.4(-65.9 to -36.8)*          | 29.0(42.7), -52.7(-73.4 to -31.9)*          |
| BP            |               |                                             |                                             |
| 18-40 yrs     | 86.4(19.4)    | 80.4(22.4), -6.0 (-11.1 to -0.9)**          | 72.4(26.2), -14.0 (-20.9 to -7.2)*          |
| 41-64 yrs     | 82.6(22.9)    | 47.0(24.0), -35.6(-46.1 to -25.1)*          | 46.4(26.3), -36.2(-46.7 to -25.7)*          |
| GH            |               |                                             |                                             |
| 18-40 yrs     | 59.5(19.4)    | 59.3(19.2), -0.2 (-5.2 to 4.8),ns           | 54.8(19.3), -4.8 (-9.8 to 0.3),ns           |
| 41-64 yrs     | 53.2(20.1)    | 41.1(11.9), -12.2(-18.1 to -6.3)*           | 38.3(17.2), -15.0(-24.1 to -5.8)*           |
| VT            |               |                                             |                                             |
| 18-40 yrs     | 60.2(18.3)    | 49.4(11.3), -10.8 (-13.9 to -7.7)*          | 49.6(12.8), -10.6 (-14.1 to -7.2)*          |
| 41-64 yrs     | 60.3(18.9)    | 41.6(10.0), -18.7(-23.7 to -13.7)*          | 40.0(14.9), -20.3(-28.9 to -11.7)*          |
| SF            |               |                                             |                                             |
| 18-40 yrs     | 90.2(16.2)    | 72.7(22.1), -17.6 (-23.3 to -11.8)*         | 76.3(20.4), -14.0 (19.4 to -8.7)*           |
| 41-64 yrs     | 92.4(16.5)    | 58.6(27.7), -33.9(-47.3 to -20.5)*          | 61.2(28.8), -31.3(-45.2 to -17.3)*          |
| RE            |               |                                             |                                             |
| 18-40 yrs     | 67.7(39.4)    | 69.4(39.9), 1.7 (-8.5 to 11.9),ns           | 75.6(35.7), 7.8 (-2.3 to 18.0),ns           |
| 41-64 yrs     | 75.0(37.0)    | 28.1(40.5), -46.9(-63.8 to -30.0)*          | 42.1(46.9), -32.9(-49.9 to -15.8)*          |
| MH            |               |                                             |                                             |
| 18-40 yrs     | 71.8(15.6)    | 69.5(16.5), -2.4 (-6.4 to 1.7),ns           | 66.9(15.7), -5.0 (-9.0 to -0.9)**           |
| 41-64 yrs     | 73.1(17.6)    | 50.1(15.9), -23.0(-31.0 to -14.9)*          | 53.9(18.3), -19.2(-27.2 to -11.1)*          |

Physical functioning (PF), social functioning (SF), role limitation due to physical problems (RP), role limitation due to emotional problem (RE), mental health (MH), bodily pain (BP), vitality (VT), and general health (GH). Among the normal controls, 1244 and 695 were in the age groups 18-40 yrs and 41-64 yrs whereas there were 60 and 19 SARS survivors in the same age categories respectively.

\* Significant at  $p < 0.01$ ; \*\* Significant at  $p < 0.03$ ; # Significant at  $p < 0.05$ ; ns denotes not significant.
